# Supplementary material for: Relation between Increased IL-10 Levels and Malaria Severity: A Systematic Review and Meta-Analysis
Source: MDPI journal article supplement (doi:10.3390/tropicalmed8010035), 2023-01-03
Supplement: s1 [file s1]

# Relation between Increased IL-10 Levels and Malaria Severity: A Systematic Review and Meta-Analysis

Phoomjai Sornsenee <sup>1</sup>, Polrat Wilairatana <sup>2</sup>, Kwuntida Uthaisar Kotepui <sup>3</sup>,  
Frederick Ramirez Masangkay <sup>4</sup>, Chonticha Romyasamit <sup>3</sup>, and Manas Kotepui <sup>3,\*</sup>

<sup>1</sup> Department of Family and Preventive Medicine, Faculty of Medicine, Prince of Songkla University, Songkhla 90110, Thailand

<sup>2</sup> Department of Clinical Tropical Medicine, Faculty of Tropical Medicine, Mahidol University, Bangkok 10400, Thailand

<sup>3</sup> Medical Technology, School of Allied Health Sciences, Walailak University, Tha Sala, Nakhon Si Thammarat 80160, Thailand

<sup>4</sup> Department of Medical Technology, University of Santo Tomas, Manila 1000, Philippines

\* Correspondence: manas.ko@wu.ac.th or manaskote@gmailcom

**Table S1. Search term**

| Databases            | Search terms/Search strategy                                                                                                                                                                                                                                                                    | Date                  |
|----------------------|-------------------------------------------------------------------------------------------------------------------------------------------------------------------------------------------------------------------------------------------------------------------------------------------------|-----------------------|
| MEDLINE (via PubMed) | ("Interleukin 10" OR IL10 OR IL-10 OR "CSIF-10" OR "Cytokine Synthesis Inhibitory Factor") AND (malaria OR Plasmodium OR "Remittent Fever" OR "Marsh Fever" OR Paludism) AND (severe OR complicated OR complication)<br><br>Search results: 357                                                 | 1 to 12 February 2022 |
| Scopus               | ("Interleukin 10" OR IL10 OR IL-10 OR "CSIF-10" OR "Cytokine Synthesis Inhibitory Factor") AND (malaria OR Plasmodium OR "Remittent Fever" OR "Marsh Fever" OR Paludism) AND (severe OR complicated OR complication)<br><br>Search option: Title, abstract, keywords<br><br>Search results: 426 | 1 to 12 February 2022 |
| Embase               | ("Interleukin 10" OR IL10 OR IL-10 OR "CSIF-10" OR "Cytokine Synthesis Inhibitory Factor") AND (malaria OR Plasmodium OR "Remittent Fever" OR "Marsh                                                                                                                                            | 1 to 12 February 2022 |

|  |                                                                                                   |  |
|--|---------------------------------------------------------------------------------------------------|--|
|  | <p>Fever" OR Paludism) AND (severe OR complicated OR complication)</p> <p>Search results: 432</p> |  |
|--|---------------------------------------------------------------------------------------------------|--|
