# Supplementary material for: Relation between Increased IL-10 Levels and Malaria Severity: A Systematic Review and Meta-Analysis
Source: Trop Med Infect Dis. 2023 Jan 3;8(1):35. doi: 10.3390/tropicalmed8010035 (PMC9865813; doi:10.3390/tropicalmed8010035)
Supplement: Supplementary file 1 [file tropicalmed-08-00035-s001.zip › Table S2. Details of the included studies.xlsx]

## Sheet: Sheet1
Relation between Increased IL-10 Levels and Malaria Severity: A Systematic Review and Meta-Analysis Phoomjai Sornsenee 1, Polrat Wilairatana 2, Kwuntida Uthaisar Kotepui 3, Frederick Ramirez Masangkay 4, Chonticha Romyasamit 3, and Manas Kotepui 3,* 1 Department of Family and Preventive Medicine, Faculty of Medicine, Prince of Songkla University, Songkhla 90110, Thailand 2 Department of Clinical …
No.	Authors	study design	study location (Year)	year	types of participants	participants (n)	Plasmodium spp.	mean age	age (years)	male%	IL-10 (mean±SD)(pg/mL)	Parasite density	Method for malaria	Method for IL-10
1	Abdullahi et al., 2021	Case-control study	Nigeria	2019	Mild malaria (45), Moderate malaria (40), Severe malaria (40), Healthy control (40)	165	P. falciparum	Mild malaria (45): 9.2 ± 2.3, Moderate malaria (40): 9.8 ± 2.2, Severe malaria (40): 8.5 ± 1.5, Healthy control (40)	< 12	50	Mild: 815±105, Moderate: 842 ± 121, Severe: 935 ± 115, Healthy control: 321 ± 52	Mild malaria (45): 2754 ± 125, Moderate malaria (40): 16,254 ± 2520, Severe malaria (40): 227,651 ± 14,533, Healthy control (40)	Microscopy	ELISA
2	Akanmori et al., 2000	Case-control study	Ghana	1995	Uncomplicated malaria (26), Cerebral malaria (60), Severe anemia (24), Healthy control (23)	133	P. falciparum	Uncomplicated malaria (26): 5 (3-8), Cerebral malaria (60): 3.5 (2-5.5), Severe anemia (24): 2 (1.1-3.3), Healthy control (23): 6.6 (4.7-7.4)	3-12 years	NS	Uncomplicated malaria (26): 725 (465-1129), Cerebral malaria (41): 966 (612-1526), Severe anemia (10): 270 (152-482), Healthy control (23): NS	Uncomplicated malaria (26): 48500 (36100-65300), Cerebral malaria (41): 78700 (60000-103300), Severe anemia (10): 40800 (25100-66500), Healthy control (23): NS	Microscopy	ELISA
3	Barber et al., 2017	Prospective observational study	Malaysia	2010-2012	P. knowlesi (severe 47, non-severe 99), P. falciparum (severe21, non-severe 109), Healthy controls (50)	326	P. falciparum/P. knowlesi	P. knowlesi (severe 47): 55 (20–81), (non-severe 99): 42 (13–83), P. falciparum (severe 21): 33 (13–60), (non-severe 109): 25 (13–78), Healthy controls (50): 35 (14–69)	≥12	P. knowlesi (severe 47): 35, (non-severe 99): 73, P. falciparum (severe 21): 15, (non-severe 109): 79, Healthy controls (50): 34	P. knowlesi (severe 47): 298 (187–1049), (non-severe 99): 127 (73–244), P. falciparum (severe 21): 465 (211–1135), (non-severe 109): 180 (85–372)	P. knowlesi (severe 47): 104000 (21700–168279), (non-severe 99): 4841 (1563–15169), P. falciparum (severe 21): 44332 (9079–237909), (non-severe 109): 10500 (4014–32267)	Microscopy/PCR	ELISA
4	Barber et al., 2015	Prospective observational study	Malaysia	2010-2012	Severe P. vivax (9), non-severe P. vivax (53)	62	P. vivax	Severe (9): 39 (30–52), non-severe (53): 24 (18–39)	≥12	Severe (9): 9, non-severe (53): 39	Severe (9): 173 (106–319), non-severe (53): 186 (41.3–504)	Severe (9): 10,243 (4387–19,520), non-severe (53): 4,209 (1700–10,165)	Microscopy/PCR	ELISA
5	Burte et al., 2013	Prospective observational study	Nigeria	2008-2010	Uncomplicated malaria (49), Cerebral malaria (19), Severe malarial anemia (22), Disease controls (21), community controls (68)	179		Uncomplicated malaria (49): 4 (2.17-7.17), Cerebral malaria (19): 4.67 (2.83-5.75), Severe malarial anemia (22): 4.83 (1.42-11.3), Disease controls (21): 5 (3-9), Healthy controls (68): 8 (4-9)	6 months to 12 years	Uncomplicated malaria (49): 61.2, Cerebral malaria (19): 63, Severe malarial anemia (22): 59, Disease controls (21): 42.9, Healthy controls (68): 50	Uncomplicated malaria (49): 730.18 (240.77-1900.77), Cerebral malaria (19): 76.55 (45.80-489.80), Severe malarial anemia (22): 199.69 (112.37-397.60), Disease controls (21): 15.94 (5.31-37.19), Healthy controls (68): 7.44 (3.70-13.45)	Uncomplicated malaria (49): 38 214 (2693-63212), Cerebral malaria (19): 13 806 (1700-56606), Severe malarial anemia (22): 5330 (462-76154)	Microscopy	Bead-based assay
6	Cox-Singh-2011	Case-control study	Malaysia	2006-2009	Uncomplicated P. knowlesi (85), complicated P. knowlesi (9), P. vivax patients (20), uncomplicated P. falciparum patients (17), complicated P. falciparum patients (5)	136	P. knowlesi, P. falciparum and P. vivax	NS	All age groups	NS	Uncomplicated P. knowlesi (85): 164.67(68.05–321.65), complicated P. knowlesi (9): 195.31 (117.94–3376.61), P. vivax patients (20): 738.21 (77.26–2727.44), uncomplicated P. falciparum patients (17): 210.62 (98.03–694.84), complicated P. falciparum patients (5):241.76 (87.37–2697.95)	Uncomplicated P. knowlesi (85): median 1,030; IQR 337–3,141, complicated P. knowlesi patients (9): median 21,715; IQR 4,298–148,326, P. vivax patients (20): NS uncomplicated P. falciparum patients (17): median 23,142; IQR 8,254–59,367, complicated P. falciparum (5): NS parasites/mL	Microscopy	ELISA
7	Duarte et al., 2007	Prospective cohort study	Gabon	1996-2000	Endemic control (17), asymptomatic infected (22), uncomplicated malaria (50), severe malaria (non-cerebral) (29), cerebral malaria (17)	135	P. falciparum	Endemic control (17): 2,7 (0,5–5), asymptomatic infected (22): 2,9 (0,1–5), uncomplicated malaria (50): 3 (0,5–5), severe malaria (non-cerebral) (29): 1,8 (0,2–4,5), cerebral malaria (17): 2,4 (0,5–5)	0.1-6 years	55	Endemic control (17): 14 (0–83), asymptomatic infected (22): 102 (0–317), uncomplicated malaria (50): 134 (0–1380), severe malaria (non-cerebral) (29): 339 (0–5200), cerebral malaria (17): 95 (0–2300)	Endemic control (17): NS, asymptomatic infected (22): 0.22 (0.01–1.2)%, uncomplicated malaria (50): 6.88 (0.05–48.6)%, severe malaria (non-cerebral) (29): 5.91 (0.08–31)%, cerebral malaria (17): 10.42 (0.15–64)%	Microscopy	ELISA
8	Herr et al., 2011	Case-control study	Germany	2007-2008	Uncomplicated malaria (21), Severe malaria (7), Healthy controls (26)	54	P. falciparum	Uncomplicated malaria (21): 42.1 ± 10.2, Severe malaria (7): 49.3 ± 15.3, Healthy controls (26): 31.2 ± 15,4		Uncomplicated malaria (21): 62, Severe malaria (7): 57, Healthy controls (26): 38	Uncomplicated malaria (21): 256.2 ± 404.7, Severe malaria (7): 204.4 ± 142.7, Healthy controls (26): 2.0 ± 0.8	NS	Microscopy	Bead-based assay
9	Lopera-Mesa et al., 2012	Prospective cohort study	United States	2008	Uncomplicated malaria (473), non-cerebral severe malaria (24), cerebral malaria (9)	506	P. falciparum	Uncomplicated malaria (473): 5 (3–9), non-cerebral severe malaria (24): 6 (3-8), cerebral malaria (9): 1 (0.875–2)	6 months–17 years	Uncomplicated malaria (473): 50, non-cerebral severe malaria (24): 54, cerebral malaria (9): 33	Uncomplicated malaria (473): 134 (20.6–605), non-cerebral severe malaria (24): 1119 (498–1892), cerebral malaria (9): 1726 (864–4304)	Uncomplicated malaria (473): 8600 (787.5–26150), non-cerebral severe malaria (24): 22888 (6975–46012), cerebral malaria (9): 34350 (10300–138150) parasites/µl	Microscopy	Bead-based assay
10	Mandala et al., 2017	Prospective observational study	Malawi	2005-2006	Uncomplicated malaria (54), Severe malarial anemia (30), Cerebral malaria (29), Healthy controls (42)	155	P. falciparum	Uncomplicated malaria (54): 27 (6–58), Severe malarial anemia (30): 23 (5–38), Cerebral malaria (29): 30 (5–84), Healthy controls (42): 20 (5–76)	5 to 84 months	Uncomplicated malaria (54): 70.4, Severe malarial anemia (30): 63.3, Cerebral malaria (29): 34.5, Healthy controls (42): 69	Uncomplicated malaria (54): 89.19 (9.82- 1306.0), Severe malarial anemia (30): 64.40 (11.81- 669.1), Cerebral malaria (29): 533.20 (26.48- 2415), Healthy controls (42): 4.50 (2.25- 9.04)	Uncomplicated malaria (54): 52,300 (460–768,000), Severe malarial anemia (30): 3,500 (20–296,000), Cerebral malaria 41,800 (900–517,000)	Microscopy	Bead-based assay
11	Mendonça et al., 2013	Retrospective observational study	Brazil	2006-2007	Endemic control (176), asymptomatic infected (148), uncomplicated malaria (187), severe malaria (survivor) (13), severe malaria (deaths) (6)	530	P. vivax	Endemic control (176): 32 (24-45), asymptomatic infected (148): 40 (32-49), uncomplicated malaria (187): 33 (27-42), severe malaria (survivor) (13): 22 (16-30), severe malaria (deaths) (6): 27 (13-44)	5-70 years	Endemic control (176): 72, asymptomatic infected (148): 70, uncomplicated malaria (187): 93, severe malaria (survivor) (13): 7, severe malaria (deaths) (6): 3	Endemic control (176): 12 (7-20.4), asymptomatic infected (148): 62.0 (11.3-89.6), uncomplicated malaria (187): 125.0 (65.3-455.1), severe malaria (survivor) (13): 140.2 (85-550), severe malaria (deaths) (6): 110.5 (79-134)	NS	Microscopy/PCR	Bead-based assay
12	Mendonça et al., 2015	Prospective observational study	Brazil	2009-2013	Uncomplicated malaria (72), Severe malaria (17)	89	P. vivax	Uncomplicated malaria (72): 36.00 (27.00–45.50), Severe malaria (17): 37.00 (10.50–44.50)	4 months to 76 years	Uncomplicated malaria (72): 77.8, Severe malaria (17): 52.9	Uncomplicated malaria (72): 87.79 (14.19-468.6), Severe malaria (17): 44.75 (8-124.4)	NS	Microscopy/PCR	ELISA
13	Olupot-Olupot et al., 2013	Prospective observational study	Kenya and Uganda	2009	Non-severe malaria (44), Severe malaria (30), Severe malaria & shock (126), died (10)	210	P. falciparum	Non-severe malaria (44): 2.52 (1.23-4.4), Severe malaria (30), 2.71 (1.29-4.8), Severe malaria & shock (126): 2.66 (1.23-4.02), died (10): NS	< 5	NS	Non-severe malaria (44): 105 (0–373), Severe malaria (30), 211 (59–744), Severe malaria & shock (126): 471 (135–1159), died (10): 492 (62–1924)	NS	Microscopy/RDT	ELISA
14	Ong’echa et al., 2011	Cross-sectional study	Kenya	NS	Uncomplicated malaria (31), Severe malarial anemia (80), None-severe malarial anemia (37)	148	P. falciparum	Uncomplicated malaria (31): 1 (IQR 0.67), Severe malarial anemia (80): 0.67 (IQR 0.67), None-severe malarial anemia (37): 0.75 (IQR 0.75)	3 months to 2.5 years	Uncomplicated malaria (31): 45.2, Severe malarial anemia (80): 48.8, None-severe malarial anemia (37): 62.2	Uncomplicated malaria (31): 168.4 (IQR 660.8), Severe malarial anemia (80): 254.5 (IQR 570.5), None-severe malarial anemia (37): 569.6 (IQR 745.5)	Uncomplicated malaria (31): 48,354 (IQR 87,430), Severe malarial anemia (80): 48,354 (IQR 87,430), None-severe malarial anemia (37): 22,615 (IQR 49,929)	Microscopy	Bead-based assay
15	Oyegue-Liabagui et al., 2017	Cross-sectional study	Gabon	2011-2014	Uncomplicated malaria (11), mild malaria anaemia (86), severe malaria anaemia (15)	122	P. falciparum	64.2 ± 2.8	< 5	NS	Uncomplicated malaria (11): 400 ± 250, mild malaria anaemia (86): 580 ± 80, severe malaria anaemia (15): 430 ± 60	46277 ± 8188	Microscopy/RDT	ELISA
16	Peyron et al., 1994	Prospective observational study	Madagasca	NS	Cerebral malaria (14), Severe malaria (11), uncomplicated malaria (24)	47	P. falciparum	Cerebral malaria (14); Madagascar (8): 23 (8-36), French hospital (6): 45 (25-60), Severe malaria (11); Madagascar (7): 20 (5-42), French hospital (6): 45 (25-60), uncomplicated malaria (24); Madagascar (16): 13 (2-41), French hospital (4): 39 (36-45)			Cerebral malaria (14): 2812 ± 626, Severe malaria (11): 2882 ± 1229, uncomplicated malaria (24): 913 ± 281	NS (in percentage)	Microscopy	ELISA
17	Singotamu et al., 2006	Prospective observational study	India	NS	Mind malaria (31), severe malaria (16)	47	P. vivax	NS	20-40 years	NS	Mild malaria (31): 452.76 ± 334.3, severe malaria (16): 279.1 ± 121.8	NS	Microscopy	ELISA
18	Sinha et al., 2010	Case-control study	India	NS	Uncomplicated malaria (endemic regions 76, non-endemic regions 13), Severe malaria (endemic regions 25, non-endemic regions 63), Healthy controls (endemic regions 102, non-endemic regions 90)	369	P. falciparum	Uncomplicated malaria (endemic regions 76: 28.02 ± 12.1, non-endemic regions 13: 29.7 ± 11.8, Severe malaria (endemic regions 25: 34 ± 13.4, non-endemic regions 63: 24.3 ± 10.9, Healthy controls (endemic regions 102: 38.9 ± 12.6, non-endemic regions 90: 28.7 ± 3.9	Adults	Uncomplicated malaria (endemic regions 76: 59.2, non-endemic regions 13: 69.2, Severe malaria (endemic regions 25: 48, non-endemic regions 63: 77.8, Healthy controls (endemic regions 102: 49, non-endemic regions 90: 56.7	Uncomplicated malaria (endemic regions 76):244.50 (9.08-1984.29.4), (non-endemic regions 13): 183.21 (16.53-910.92), Severe malaria (endemic regions 25): 671.29 (7.4-1691.29), (non-endemic regions 63): 178.87 (4.14-2594.76), Healthy controls (endemic regions 102): 20.46 (2.28-90.84), (non-endemic regions 90): 3.16 (1.7-105.32)	NS	Microscopy/RDT/PCR	ELISA
19	Thuma et al., 2011	Prospective observational study	Zambia	2001-2005	Severe malarial anemia (72), cerebral malaria (28), uncomplicated malaria (66)	166	P. falciparum	Severe malarial anemia (72): 22 (16–31), cerebral malaria (28): 37 (26–43), uncomplicated malaria (66): 26 (18–36)	<6 years	Severe malarial anemia (72): 44.4, cerebral malaria (28): 60.7, uncomplicated malaria (66): 50	Severe malarial anemia (56): 338 (140–1001), cerebral malaria (23): 3553 (1361–6,040), uncomplicated malaria (56): 1738 (439–5258)	Severe malarial anemia (72): 95 (0.1–153), cerebral malaria (28): 99 (11–302), uncomplicated malaria (66): 147 (26–254) parasites, X 10^-3/µL	Microscopy	Bead-based assay

## Sheet: Sheet2
No	Author (year)	Mean_severe	SD_severe	N_severe	Mean_non	SD_non	N_non	mean_sym	SD_sym	N_sym	mean_asym	SD_asym	N_asym	Cmean	CSD	CN	Type of control	Malaria_mean	malaria_SD	Malaria_N
1	Acquah et al.,2016
2	Adegnika et al.,2006
3	Alfandari et al.,1996
4	Amah et al.,2011
5	Andrade et al.,2010	15.8	2.54	19	6.66	1.35	110							6.12	1.68	90	Healthy and febrile control
6	Aninagyei et al.,2021													0.75	0.23	120	Healthy control	1.74	0.19	80
7	Laval et al.,2014
8	Mast et al.,2010
9	Hollestelle et al.,2006	85.2	109	99	102.9	80.5	44							30.7	48.7	74	Febrile control
10	Huang et al.,2019
11	Kuna et al.,2015
12	NAIK et al.,1984
13	Paul et al., 2012
14	Righi et al.,2016	21.9	9.9	9	9.6	6.4	21
15	Yayan et al.,2017
16	Kremsner et al.,1996	137	71	29	47.1	41.7	64
17	Atkinson et al.,2015													1.08	0.34	452	Febrile control	3.07	3.52	70
18	Beesley et al.,2000
19	Conroy et al.,2011
20	Cruz et al.,2018
21	Cruz et al.,2019							18.1	7.5	141	7.6	1.69	127
22	Cusick et al.,2016	707.1	194.4	156										6.18	4.08	83	Healthy control
23	Czepiel et al.,2017
24	Epelboin et al., 2013
25	ERIKSSON et al., 1989													140.8	137.2	120	Febrile control	74.5	49.7	258
26	GJØRUP et al.,2007
27	Gyan et al.,2002	239.6	50.4	105	124.3	35.5	53
28	Kutsuna et al.,2014													22.68	9.88	116	Febrile control	53.4	8	86
29	Kutsuna et al.,2015
30	Leli et al.,2020													3.68	2.23	190	Febrile control	9.65	2.49	21
31	Mendonça et al., 2013	24.6	12.8	19				18	7.12	187	8.23	2.18	148	5.98	1.71	176	Healthy and febrile control
32	Wolfswinkel et al., 2013	226.3	118.7	61	123.8	91	259
33	Van Santen et al.,2011													18.8	9.57	39	Healthy control	31.9	13.3	30
34	Saad et al.,2012	76.2	21.4	32	57.6	17.1	32							22.6	6.73	32	Healthy control
35	Cercamondi et al.,2010
36	Cooper et al.,2014
37	Dongmo et al.,2011
38	BOZKURT et al.,2018
39	JAKOBSEN et al.,1998							66	17.9	27	18.3	13	32				Healthy control	1	0.61	40
40	Righetti et al.,2012
41	Reuling et al.,2018
42	Verhoef et al.,2001										12.5		15	6.8		76	Healthy control
43	Hoorn et al.,2012
44	Wolfswinke et al.,2012
