# Supplementary material for: Relation between Increased IL-10 Levels and Malaria Severity: A Systematic Review and Meta-Analysis
Source: Trop Med Infect Dis. 2023 Jan 3;8(1):35. doi: 10.3390/tropicalmed8010035 (PMC9865813; doi:10.3390/tropicalmed8010035)
Supplement: Supplementary file 1 [file tropicalmed-08-00035-s001.zip › Table S3. Quality of the included studies.xlsx]

## Sheet: Sheet1
No.	Case-control studies	Score (out of 22)	Score (percentile)	Quality	Introduction			Methods									Results					Discussion				Other information
					Title and abstract	Background/rationale	Objectives	Study design	Setting	Participants	Variables	Data sources/ measurement	Bias	Study size	Quantitative variables	Statistical methods	Participants	Descriptive data	Outcome data	Main results	Other analyses	Key results	Limitations	Interpretation	Generalisability	Funding
1	Abdullahi et al., 2021	21	96	High	1	1	1	1	1	1	1	1	1	1	1	1	1	1	1	1	1	1	0	1	1	1
2	Akanmori et al., 2000	19	86	High	1	1	1	0	1	1	1	1	1	0	1	1	1	1	1	1	1	1	0	1	1	1
3	Herr et al., 2011	20	91	High	1	1	1	0	1	1	1	1	1	0	1	1	1	1	1	1	1	1	1	1	1	1
4	Cox-Singh-2011	20	91	High	1	1	1	0	1	1	1	1	1	0	1	1	1	1	1	1	1	1	1	1	1	1
5	Sinha et al., 2010	19	86	High	1	1	1	1	1	1	1	1	1	0	1	1	1	0	1	1	1	1	0	1	1	1
	Cross-sectional studies
6	Ong’echa et al., 2011	17	77	High	1	1	1	0	1	1	1	1	1	0	1	1	1	1	1	1	1	1	0	1	1	1
7	Oyegue-Liabagui et al., 2017	19	86	High	1	1	1	0	1	1	1	1	1	0	1	1	1	1	1	1	1	1	0	1	1	1
	Prospective cohort study
8	Duarte et al., 2007	19	86	High	1	1	1	0	1	1	1	1	1	0	1	1	1	1	1	1	1	1	0	1	1	1
9	Lopera-Mesa et al., 2012	21	96	High	1	1	1	1	1	1	1	1	1	0	1	1	1	1	1	1	1	1	1	1	1	1
	Prospective observational studies
10	Barber et al., 2015	21	91	High	1	1	1	1	1	1	1	1	1	0	1	1	1	1	1	1	1	1	1	1	1	1
11	Barber et al., 2017	21	91	High	1	1	1	1	1	1	1	1	1	0	1	1	1	1	1	1	1	1	1	1	1	1
12	Burte et al., 2013	21	96	High	1	1	1	1	1	1	1	1	1	0	1	1	1	1	1	1	1	1	1	1	1	1
13	Mandala et al., 2017	20	91	High	1	1	1	0	1	1	1	1	1	0	1	1	1	1	1	1	1	1	1	1	1	1
14	Peyron et al., 1994	21	96	High	1	1	1	0	1	1	1	1	1	0	1	1	1	1	1	1	1	1	0	1	1	1
15	Mendonça et al., 2015	20	91	High	1	1	1	0	1	1	1	1	1	0	1	1	1	1	1	1	1	1	1	1	1	1
16	Olupot-Olupot et al., 2013	20	91	High	1	1	1	0	1	1	1	1	1	0	1	1	1	1	1	1	1	1	1	1	1	1
17	Singotamu et al., 2006	16	73	Moderate	1	1	1	0	1	1	1	1	1	0	1	0	1	0	1	1	1	1	0	1	1	0
18	Thuma et al., 2011	21	96	High	1	1	1	1	1	1	1	1	1	0	1	1	1	1	1	1	1	1	1	1	1	1
	Retrospective observational studies
19	Mendonça et al., 2013	20	91	High	1	1	1	1	1	1	1	1	1	0	1	1	1	1	1	1	1	1	0	1	1	1
